# Leukocyte telomere length-related genetic variants in *ACYP2* contribute to the risk of esophageal carcinoma in Chinese Han population

Quan Fang<sup>1,\*</sup>, Lihong Hui<sup>1,\*</sup>, Zhaorui Min<sup>1</sup>, Lifeng Liu<sup>1</sup>, Yuan Shao<sup>1</sup>

<sup>1</sup>Department of Otorhinolaryngology, The First Affiliated Hospital of Xi'an Jiaotong University, Xi'an, Shaanxi 710061, P.R. China

\*These authors have contributed equally to this work

Correspondence to: Yuan Shao, email: shaxiaoying1976@163.com  
Lifeng Liu, email: llf969@163.com

**Keywords:** esophageal carcinoma, gene polymorphisms, case-control study, *ACYP2*

**Received:** December 21, 2016

**Accepted:** February 13, 2017

**Published:** March 10, 2017

Copyright: Fang et al. This is an open-access article distributed under the terms of the Creative Commons Attribution License (CC-BY), which permits unrestricted use, distribution, and reproduction in any medium, provided the original author and source are credited

## ABSTRACT

**Background:** Short leukocyte telomere length has been associated with significantly increased risk of esophageal carcinoma. A previous genome-wide association study demonstrated that *ACYP2* was associated with leukocyte telomere length. However, the role of *ACYP2* genetic variants on esophageal carcinoma susceptibility is still unknown. Therefore, we investigated whether *ACYP2* polymorphisms have impact on the risk of esophageal carcinoma in Chinese.

**Materials and Methods:** We conducted a case-control study among 386 cases and 495 healthy controls from northwest China. 14 SNPs in *ACYP2* were selected and genotyped using Sequenom MassARRAY technology. Odds ratios (OR) and 95% confidence intervals (CIs) were calculated by unconditional logistic regression adjusting for age and gender.

**Results:** We found that 1.34-fold increased risk of esophageal carcinoma is associated with the rs11125529 A allele compared with the rs11125529 C allele (OR=1.29, 95%CI: 1.02-1.62,  $p=0.030$ ) under the additive model, after adjusted by age and gender. We also found rs11896604 and rs17045754 loci increased the esophageal carcinoma risk under the additive model (rs11896604: OR=1.34, 95%CI: 1.03-1.76,  $p=0.032$ ; rs17045754: OR=1.36, 95%CI: 1.03-1.80,  $p=0.028$ ). One main linkage block was observed across the locus. This block was comprised of seven closely linked SNPs: rs1682111, rs843752, rs10439478, rs843645, rs11125529, rs843711 and rs11896604. The haplotype analysis detected that haplotype "TTCTATG" increased the risk of esophageal carcinoma (OR=1.38, 95%CI: 1.04-1.82,  $p=0.025$ ).

**Conclusion:** In conclusion, *ACYP2* gene may be associated with an increased risk of esophageal carcinoma in Chinese Han populations. Future studies to address the biological function of this polymorphism in the development of esophageal carcinoma are warranted.

## INTRODUCTION

Esophageal carcinoma (EC) is one of the most common cancers in our country, and the survival rate of five year is less than 15%, its clinical effect is still limited at present [1]. In China, the incidence of esophageal carcinoma is 21.88/105, and higher than western countries [2]. Esophageal carcinoma according to histological type

can be divided into esophageal squamous cell carcinoma, adenocarcinoma and undifferentiated carcinoma. Among them, esophageal squamous cell carcinoma accounts for 90%. In terms of lifestyle, smoking has been identified can cause esophageal cancer, especially smoking and excessive drinking can significantly increase the risk of esophageal carcinoma [3, 4]. Genetic factors also have an impact on the occurrence of esophageal carcinoma.

Cui et al. [5] found two significant susceptibility genes, ADH1B and ALDH2 in 1070 cases of Japanese esophageal carcinoma and 2836 controls. Wang et al. [6] found that *PLCE1* gene and *C20orf54* gene associated with ESCC. GWAS study of Wu et al. in Chinese population of esophageal cancer, and seven susceptibility sites for esophageal cancer were found in five regions (5q11 rs10052657, 21q22 rs2014300, 6p21 rs10484761, 10q23 rs2274223 and 12q24 rs11066015, rs2074356, rs11066280) [7]. Abnet et al. [8] found that rs2274223 in *PLCE1* associated with ESCC. Beyond that, genes associated with susceptibility to ESCC mainly contain metabolizing enzyme-associated genes (*CYP450*, *GSTP1*, *ALDH2*), nucleotide excision repair genes (*XRCC1*, *XPD*, *hOGG1*), tumor suppressor genes, oncogenes (*p53*, *ECRG1*, *ECRG2*, *cyclinD1*), cytokines (*IL6*, *IL18*, *IL12*), matrix metalloproteinase (MMPs).

Telomere contains repeating nucleotide sequences and a related terminal protein complex that plays a key role in maintaining chromosome integrity and stability, as well as telomere shortening involved in the carcinogenesis and progression of malignant tumors [9]. Associations with telomere length have been reported for cancers of the digestive system [10, 11]. Du et al. [12] found that telomere length effected the risk of esophageal squamous cell carcinoma risk, telomere too short or too long to increase the risk of esophageal cancer. A genome-wide meta-analysis identified seven loci, including *ACYP2* rs11125529, associated with mean leukocyte telomere length [13]. However, the role of *ACYP2* gene on esophageal carcinoma susceptibility is still unknown. So, we want to examined whether the *ACYP2* gene polymorphism have impact on the risk of esophageal carcinoma in Chinese population.

## RESULTS

The characteristics of these populations are summarized in Table 1. We included 386 esophageal carcinoma patients, which consisted of 308 males and 78 females with a mean age of 60.68±8.95 years at the time of diagnosis. The 495 healthy controls were recruited, included 180 males and 315 females with a mean age of 54.48±9.44 years. It exist differences between gender and age distribution between the case and control groups.

14 SNPs in the *ACYP2* gene were analyzed in our study. Chromosomal, position, HWE *p* value, minor allele frequency for all the SNPs are shown in Table 2. The rs843740 and rs12615793 was cut off at 5% HWE *p* level.

Further genetic models analyses used logistic test, adjusted by age and gender, we found that rs11125529, rs11896604 and rs17045754 loci increased the esophageal carcinoma risk under the additive model (rs11125529: OR=1.34, 95%CI: 1.01-1.77, *p*=0.04; rs11896604: OR=1.34, 95%CI: 1.03-1.76, *p*=0.032; rs17045754: OR=1.36, 95%CI: 1.03-1.8, *p*=0.028) (Table 3).

*D'* and *r*<sup>2</sup> were used to measure the degree of linkage disequilibrium between the two SNPs. *D'* confidence intervals were used to classify the haplotypes. One main linkage block was observed across the locus (Figure 1). This block was comprised of seven closely linked SNPs: rs1682111, rs843752, rs10439478, rs843645, rs11125529, rs843711, rs11896604. The haplotype analysis detected that haplotype "TTCTATG" increased the risk of esophageal carcinoma (OR=1.38, 95%CI: 1.04-1.82, *p*=0.025) (Table 4).

## DISCUSSION

We adopted case-control method to explore the influence of *ACYP2* genetic polymorphisms on esophageal carcinoma. We found that rs11125529, rs11896604 and rs17045754 loci increased the esophageal carcinoma risk Chinese Han population.

The *ACYP2* gene encodes an 11 kDa acylphosphatase, a small cytoplasmic enzyme that is widely distributed in vertebrate tissue in two different isoenzyme forms. Acyl phosphatase is one of the smallest molecular weight proteins found in the present study, which catalyze the hydrolysis of acyl phosphate compounds *in vitro*. The study of the acyl phosphatase in vertebrates indicates that it is related to many important biological processes, such as glycolysis pathway, apoptosis, Na<sup>+</sup>, K<sup>+</sup> and Ca<sup>2+</sup> ion pump control, etc. The main function of *ACYP2* is closely related to pyruvate metabolism, cell differentiation and apoptosis [14]. Therefore, the mutation of *ACYP2* may be related to tumorigenesis.

There are few studies on *ACYP2* gene and disease. One study found that overexpression of *ACYP* triggers cell differentiation of SH-SY5Y neuroblastoma cells [15]. In colorectal cancer, *ACYP* is also involved in the metastasis of human colorectal cancer cell line [16]. In our research, we also found that rs11896604 and rs17045754 loci on *ACYP2* gene increased the esophageal carcinoma risk. But, it is unclear that this site is how to affect the incidence of esophageal cancer. In the future, we will adopt molecular biology and cell biology method to study the mechanism of action.

Du et al. [12] found that telomere length effected the risk of esophageal squamous cell carcinoma risk, telomere too short or too long to increase the risk of esophageal cancer. Codd et al. by a large case-control study found 7 genes that affect telomere length (*TERC*, *TERT*, *NAF1*, *OBFC1*, *ZNF208*, *RTEL1* and *ACYP2*), they determine the *ACYP2* rs11125529 locus mutation shortened telomere length in European populations [13]. In our study, we found that *ACYP2* rs11125529 increased the risk of esophageal cancer. Telomere contains repeating nucleotide sequences and a related terminal protein complex that plays a key role in maintaining chromosome integrity and stability, as well as telomere shortening involved in the

**Table 1: Characteristics of esophageal carcinoma cases and controls**

|                | Case       | Control    | <i>p</i>        |
|----------------|------------|------------|-----------------|
| Gender         | 386        | 495        | <i>p</i> <0.001 |
| female         | 78         | 315        |                 |
| male           | 308        | 180        |                 |
| Mean Age, year | 60.68±8.95 | 54.48±9.44 | <i>p</i> <0.001 |

*p* < 0.05 indicates statistical significance.

**Table 2: Frequency distributions of alleles and their associations with esophageal carcinoma**

| SNP rs#    | Chromosome | Position | Alleles A/B | Gene(s) | MAF-Case | MAF-Control | HWE <i>p</i> -value | OR(95%CI)       | <i>p</i> -value |
|------------|------------|----------|-------------|---------|----------|-------------|---------------------|-----------------|-----------------|
| rs6713088  | 2          | 54345469 | G/C         | ACYP2   | 0.41     | 0.40        | 0.778               | 1.08(0.89-1.31) | 0.448           |
| rs12621038 | 2          | 54391113 | T/C         | ACYP2   | 0.47     | 0.46        | 0.786               | 1.05(0.87-1.27) | 0.598           |
| rs1682111  | 2          | 54427979 | A/T         | ACYP2   | 0.32     | 0.30        | 0.832               | 1.08(0.88-1.32) | 0.482           |
| rs843752   | 2          | 54446587 | G/T         | ACYP2   | 0.24     | 0.27        | 0.569               | 0.87(0.7-1.08)  | 0.219           |
| rs10439478 | 2          | 54459450 | C/A         | ACYP2   | 0.44     | 0.43        | 0.927               | 1.02(0.84-1.23) | 0.860           |
| rs843645   | 2          | 54474664 | G/T         | ACYP2   | 0.23     | 0.26        | 1.000               | 0.86(0.69-1.07) | 0.166           |
| rs11125529 | 2          | 54475866 | A/C         | ACYP2   | 0.21     | 0.18        | 0.092               | 1.23(0.97-1.56) | 0.093           |
| rs12615793 | 2          | 54475914 | A/G         | ACYP2   | 0.23     | 0.19        | 0.042               | 1.29(1.02-1.62) | 0.030           |
| rs843711   | 2          | 54479117 | T/C         | ACYP2   | 0.46     | 0.45        | 0.124               | 1.04(0.86-1.26) | 0.689           |
| rs11896604 | 2          | 54479199 | G/C         | ACYP2   | 0.23     | 0.19        | 0.249               | 1.21(0.96-1.52) | 0.112           |
| rs843706   | 2          | 54480369 | A/C         | ACYP2   | 0.47     | 0.46        | 0.069               | 1.03(0.85-1.25) | 0.745           |
| rs17045754 | 2          | 54496757 | C/G         | ACYP2   | 0.21     | 0.18        | 0.297               | 1.18(0.93-1.5)  | 0.166           |
| rs843740   | 2          | 54499344 | A/G         | ACYP2   | 0.40     | 0.46        | 0.000               | 0.78(0.64-0.94) | 0.010           |
| rs843720   | 2          | 54510660 | G/T         | ACYP2   | 0.37     | 0.34        | 0.422               | 1.16(0.95-1.41) | 0.146           |

HWE, Hardy-Weinberg Equilibrium; MAF, minor allele frequency; ORs, odds ratios; CI, confidence interval; *p* < 0.05 indicates statistical significance.

carcinogenesis and progression of malignant tumors [9]. So, we assume that *ACYP2* gene affecting the incidence of esophageal cancer through impact the telomere length.

In our research, we also found that rs11896604 and rs17045754 loci on *ACYP2* gene increased the esophageal carcinoma risk. The rs11896604 and rs17045754 loci on the *ACYP2* gene were found to be associated with ischemic stroke in a case-control study of 300 patients with ischemic stroke and 300 healthy individuals [17]. In a study of *ACYP2* and high-altitude pulmonary edema, two sites, rs11896604 and rs12615793, were found to reduce the risk of high-altitude pulmonary edema [18]. But, it is unclear that this site is how to affect the incidence of esophageal cancer. In the future, we will adopt molecular biology and cell biology method to study the mechanism of action.

Because the information of patient is not complete, there is no analysis of the impact of these factors (Cigarette smoking and alcohol drinking) on esophageal cancer. So the association between *ACYP2* gene polymorphisms and drinking and smoking status in esophageal carcinoma need to be evaluated in future studies.

In summary, this study results provided new evidence that *ACYP2* gene was associated with esophageal carcinoma in the Chinese Han population from northwest China, which may serve as a prognostic biomarker for esophageal carcinoma among Chinese population. Future study will focus on the function of *ACYP2* in esophageal carcinoma patients, leading to the better prevention or early detection and better prognosis for esophageal carcinoma.

**Table 3: The association between *ACYP2* gene polymorphisms and esophageal carcinoma adjusted by age and gender**

| SNP        | model           | genotype | control | case | OR(95%CI)       | <i>p</i> | OR(95%CI)       | <i>p</i> |
|------------|-----------------|----------|---------|------|-----------------|----------|-----------------|----------|
| rs11125529 | genotype model  | CC       | 327     | 234  | 1               |          | 1               |          |
|            |                 | AC       | 158     | 131  | 1.16(0.87-1.54) | 0.313    | 1.3(0.94-1.8)   | 0.114    |
|            |                 | AA       | 10      | 15   | 2.10(0.93-4.75) | 0.076    | 2.02(0.82-4.97) | 0.127    |
|            | dominant model  | CC       | 327     | 234  | 1               |          | 1               |          |
|            |                 | AC-AA    | 168     | 146  | 1.21(0.92-1.60) | 0.171    | 1.35(0.98-1.85) | 0.063    |
|            | recessive model | CC-AC    | 485     | 365  | 1               |          | 1               |          |
|            |                 | AA       | 10      | 15   | 1.99(0.89-4.49) | 0.096    | 1.84(0.75-4.51) | 0.18     |
| rs11896604 | additive model  | -        | -       | -    | 1.24(0.97-1.59) | 0.084    | 1.34(1.01-1.77) | 0.04     |
|            | genotype model  | CC       | 317     | 226  | 1               |          | 1               |          |
|            |                 | CG       | 164     | 137  | 1.17(0.88-1.56) | 0.274    | 1.36(0.99-1.88) | 0.061    |
|            |                 | GG       | 14      | 17   | 1.70(0.82-3.53) | 0.152    | 1.73(0.77-3.89) | 0.188    |
|            | dominant model  | CC       | 317     | 226  | 1               |          | 1               |          |
|            |                 | CG-GG    | 178     | 154  | 1.21(0.92-1.60) | 0.168    | 1.39(1.02-1.91) | 0.038    |
|            | recessive model | CC-CG    | 481     | 363  | 1               |          | 1               |          |
| rs17045754 | genotype model  | GG       | 14      | 17   | 1.61(0.78-3.01) | 0.196    | 1.55(0.69-3.45) | 0.288    |
|            |                 | -        | -       | -    | 1.22(0.96-1.59) | 0.104    | 1.34(1.03-1.76) | 0.032    |
|            |                 | GG       | 325     | 233  | 1               |          | 1               |          |
|            | dominant model  | CG       | 157     | 127  | 1.13(0.85-1.50) | 0.412    | 1.33(0.96-1.85) | 0.086    |
|            |                 | CC       | 13      | 16   | 1.71(0.81-3.64) | 0.158    | 2.02(0.86-4.74) | 0.106    |
|            |                 | GG       | 325     | 233  | 1               |          | 1               |          |
|            | recessive model | CG-CC    | 170     | 143  | 1.17(0.89-1.55) | 0.261    | 1.39(1.01-1.90) | 0.044    |
| rs17045754 | additive model  | GG-CG    | 482     | 360  | 1               |          | 1               |          |
|            |                 | CC       | 13      | 16   | 1.65(0.78-3.47) | 0.186    | 1.83(0.79-4.25) | 0.161    |
|            |                 | -        | -       | -    | 1.19(0.93-1.51) | 0.160    | 1.36(1.03-1.80) | 0.028    |

ORs, odds ratios; CI, confidence interval;  $p < 0.05$  indicates statistical significance.

**Table 4: The haplotype frequencies of gene polymorphisms and esophageal cancer risk**

| Gene  | SNPs                                                                  | Haplotype | Crude analysis  |       | Adjusted analysis |       |
|-------|-----------------------------------------------------------------------|-----------|-----------------|-------|-------------------|-------|
|       |                                                                       |           | OR(95%CI)       | p     | OR(95%CI)         | p     |
| ACYP2 | rs1682111 rs843752 rs10439478 rs843645 rs11125529 rs843711 rs11896604 | TGAGCTC   | 0.82(0.65-1.03) | 0.087 | 0.81(0.63-1.04)   | 0.096 |
|       |                                                                       | ATATCCC   | 1.08(0.87-1.32) | 0.493 | 0.99(0.79-1.25)   | 0.939 |
|       |                                                                       | TTCTCCC   | 0.84(0.67-1.06) | 0.147 | 0.88(0.67-1.14)   | 0.316 |
|       |                                                                       | TTCTATG   | 1.28(1-1.64)    | 0.050 | 1.38(1.04-1.82)   | 0.025 |
|       |                                                                       | TTCTCTG   | 0.58(0.2-1.7)   | 0.324 | 1.23(0.36-4.19)   | 0.746 |

ORs, odds ratios; CI, confidence interval;  
 $p < 0.05$  indicates statistical significance.

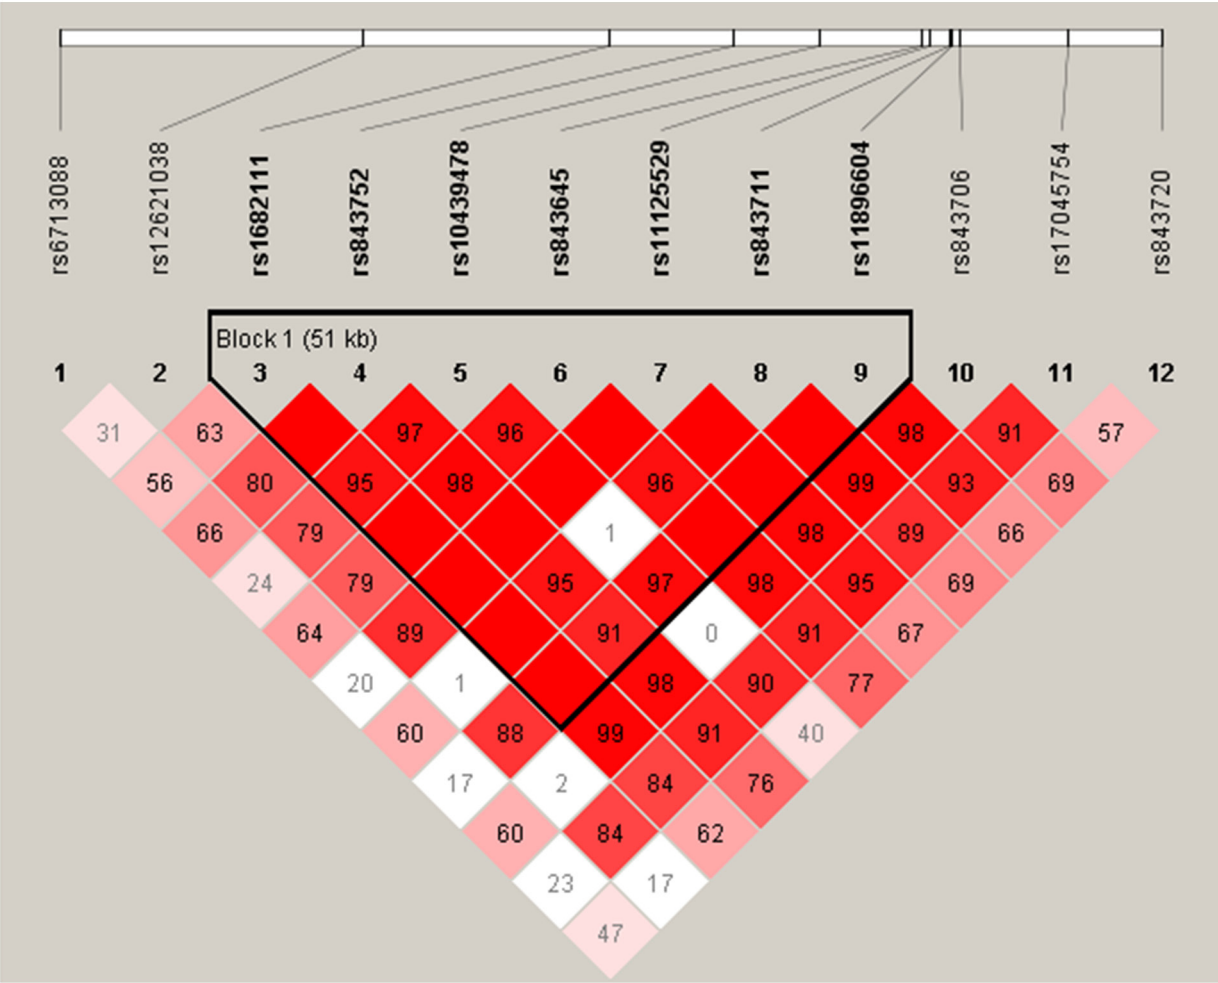

**Figure 1: Haplotype block map for all the SNPs of the ACYP2 gene.** A standard color scheme is used to display LD with bright red for very strong LD (LOD=2, D'= 1), white for no LD (LOD<2, D'<1), pink red (LOD=2, D'<1), and blue (LOD<2, D'=1) for intermediate LD.



## MATERIALS AND METHODS

### Study participants

We adopted case-control method to research the association of *ACYP2*, telomere related genes, on esophageal carcinoma risk. From 2014 July to 2015 October, 386 participants with esophageal carcinoma at the first affiliated Hospital of Xi'an Jiaotong University were recruited. All esophageal carcinoma patients were diagnosed according to X-ray barium meal examination. Observe the esophageal peristalsis, the tension of the wall, the changes of the esophageal mucosa, the filling defect of the esophagus and the degree of obstruction. Esophageal peristalsis pause or reverse peristalsis, the esophageal wall local stiffness could not be fully dilated, esophageal mucosa disorder, disruption and destruction, esophageal stenosis, irregular filling defect or ulcer and esophageal fistula, and esophageal axial abnormalities are important symptom for esophageal carcinoma. Patients with any previous cancers or autoimmune diseases, chemotherapy or radiotherapy were excluded from the study. Meanwhile 495 healthy blood donors were selected as control group in the first affiliated Hospital of Xi'an Jiaotong University.

All of the participants signed an informed consent agreement. The Human Research Committee for Approval of Research Involving Human Subjects, the first affiliated Hospital of Xi'an Jiaotong University approved the use of human tissue in this study.

### SNP selection and genotyping

Among the 14 SNPs were selected, rs11125529 was chosen from previously published polymorphisms associated with telomere length [13], others were randomly chosen from the published gene *ACYP2* associated with telomere length, with minor allele frequencies >5% in the HapMap Chinese Han Beijing population. We used the GoldMag-Mini Whole Blood Genomic DNA Purification Kit (GoldMag Co. Ltd. Xi'an City, China) extracted from whole blood. Using a NanoDrop 2000 (Gene Company Limited) were measured DNA concentrations. We used Sequenom MassARRAY Assay Design 3.0 Software to design a Multiplexed SNP MassEXTEND assay [19]. Sequenom MassARRAY RS1000 was used for genotyping, and the related data were managed using Sequenom Typer 4.0 Software [19, 20]. Laboratory personnel were blinded to the genotyping results of all samples.

### Statistical analysis

Data analysis was performed using Microsoft Excel (Redmond, WA, USA) and SPSS 19.0 statistical package (SPSS, Chicago, IL, USA). All *p* values were two-sided, and *p* < 0.05 was indicated statistical significance. Each SNP frequency in the control subjects was assessed for departure

from Hardy–Weinberg Equilibrium (HWE) using an exact test. We calculated genotype frequencies of cases and controls using a  $\chi^2$  test [21]. Odds ratios (ORs) and 95 % confidence intervals (CIs) were determined using unconditional logistic regression with adjustment for age and sex [22].

Four genetic models (genotype, dominant, recessive, and additive model) were performed using PLINK software (<https://www.cog-genomics.org/plink2>), to characterize the potential association of each *ACYP2* polymorphism with the risk of esophageal carcinoma. Finally, we used Haploview software package (version 4.2) to do haplotype analysis used 495 control samples. Firstly, we make linkage disequilibrium analysis. Using the parameter *D'* and *r*<sup>2</sup> to measure the degree of linkage disequilibrium between the two SNPs loci. Using *D'* confidence interval method divided haplotype block haplotype block.  $|D'| \leq 1$ , the more close to 1, the higher the level of linkage disequilibrium between sites;  $R^2 \leq 1$ , the more close to 1, the higher the level of linkage disequilibrium between the loci. The Odds ratios (ORs) and 95% confidence intervals (CIs) of haplotype were determined using unconditional logistic regression with adjustment for age and sex [23, 24].

## ACKNOWLEDGMENTS

This work is supported by National Natural Science Foundation (No. 30901946) and Shaanxi Science and technology support program (No. 2015SF093). We are grateful to all patients and individuals who participated in the study. We would also like to thank the clinicians and other hospital staff who contributed to the data collection for this study.

## CONFLICTS OF INTEREST

The authors declare that they have no conflicts of interest.

## REFERENCES

1. Torre LA, Bray F, Siegel RL, Ferlay J, Lortet-Tieulent J and Jemal A. Global cancer statistics, 2012. *CA Cancer J Clin*. 2015; 65:87-108.
2. Chen W, Zheng R, Zhang S, Zhao P, Zeng H, Zou X and He J. Annual report on status of cancer in China, 2010. *Chinese journal of cancer research*. 2014; 26:48-58.
3. Oze I, Matsuo K, Ito H, Wakai K, Nagata C, Mizoue T, Tanaka K, Tsuji I, Tamakoshi A, Sasazuki S, Inoue M and Tsugane S. Cigarette smoking and esophageal cancer risk: an evaluation based on a systematic review of epidemiologic evidence among the Japanese population. *Japanese journal of clinical oncology*. 2012; 42:63-73.
4. Oze I, Matsuo K, Wakai K, Nagata C, Mizoue T, Tanaka K, Tsuji I, Sasazuki S, Inoue M and Tsugane S. Alcohol

- drinking and esophageal cancer risk: an evaluation based on a systematic review of epidemiologic evidence among the Japanese population. *Japanese journal of clinical oncology*. 2011; 41:677-692.
5. Cui R, Kamatani Y, Takahashi A, Usami M, Hosono N, Kawaguchi T, Tsunoda T, Kamatani N, Kubo M and Nakamura Y. Functional Variants in ADH1B and ALDH2 Coupled With Alcohol and Smoking Synergistically Enhance Esophageal Cancer Risk. *Gastroenterology*. 2009; 137:1768-1775.
  6. Wang LD, Zhou FY, Li XM, Sun LD, Song X, Jin Y, Li JM, Kong GQ, Qi H and Cui J. Genome-wide association study of esophageal squamous cell carcinoma in Chinese subjects identifies susceptibility loci at PLCE1 and C20orf54. *Nature Genetics*. 2014; 42:759-763.
  7. Chen W, Zhibin H, Zhonghu H, Weihua J, Feng W, Yifeng Z, Zhihua L, Qimin Z, Yu L and Dianke Y. Genome-wide association study identifies three new susceptibility loci for esophageal squamous-cell carcinoma in Chinese populations. *Nature Genetics*. 2011; 43:679.
  8. Abnet CC, Freedman ND, Hu N, Wang ZM, Yu K, Shu XO, Yuan JM, Zheng W, Dawsey SM and Dong LM. A shared susceptibility locus in PLCE1 at 10q23 for gastric adenocarcinoma and esophageal squamous cell carcinoma. *Nat Genet. Nature Genetics*. 2010; 42:764-767.
  9. de Lange T. Shelterin: the protein complex that shapes and safeguards human telomeres. *Genes & development*. 2005; 19:2100-2110.
  10. Wennerstrom EC, Risques RA, Prunkard D, Giffen C, Corley DA, Murray LJ, Whiteman DC, Wu AH, Bernstein L, Ye W, Chow WH, Vaughan TL and Liao LM. Leukocyte telomere length in relation to the risk of Barrett's esophagus and esophageal adenocarcinoma. *Cancer medicine*. 2016; 5:2657-65.
  11. Hou L, Savage SA, Blaser MJ, Perez-Perez G, Hoxha M, Dioni L, Pegoraro V, Dong LM, Zatonski W, Lissowska J, Chow WH and Baccarelli A. Telomere length in peripheral leukocyte DNA and gastric cancer risk. *Cancer epidemiology, biomarkers & prevention* 2009; 18:3103-3109.
  12. Du J, Xue W, Ji Y, Zhu X, Gu Y, Zhu M, Wang C, Gao Y, Dai J and Ma H. U-shaped association between telomere length and esophageal squamous cell carcinoma risk: a case-control study in Chinese population. *Frontiers of Medicine*. 2015; 9:478-486.
  13. Codd V, Nelson CP, Albrecht E, Mangino M, Deelen J, Buxton JL, Hottenga JJ, Fischer K, Esko T, Surakka I, Broer L, Nyholt DR, Mateo Leach I, et al. Identification of seven loci affecting mean telomere length and their association with disease. *Nature genetics*. 2013; 45:422-427, 427e421-422.
  14. Calamai M, Canale C, Relini A, Stefani M, Chiti F and Dobson CM. Reversal of protein aggregation provides evidence for multiple aggregated States. *Journal of molecular biology*. 2005; 346:603-616.
  15. Cecchi C, Liguri G, Fiorillo C, Bogani F, Gambassi M, Giannoni E, Cirri P, Baglioni S and Ramponi G. Acylphosphatase overexpression triggers SH-SY5Y differentiation towards neuronal phenotype. *Cellular and molecular life sciences* 2004; 61:1775-1784.
  16. Riley HD, Macnab J, Farrell TJ and Cohn K. The expression of acylphosphatase is associated with the metastatic phenotype in human colorectal tumors. *Carcinogenesis*. 1997; 18:2453-2455.
  17. Liang Y, Zhang R, Zhang S, Ji G, Shi P, Yang T, Liu F, Feng J, Li C, Guo D and Chen M. Association of ACYP2 and TSPYL6 Genetic Polymorphisms with Risk of Ischemic Stroke in Han Chinese Population. *Mol Neurobiol*. 2016.
  18. He Y, Zhang X, Li X, Du J, He X, Zhang Z, Zhang Y, Kang L, Jin T and Yuan D. Telomere length-related gene ACYP2 polymorphism is associated with the risk of HAPE in Chinese Han population. *Journal of Gene Medicine*. 2016; 18:244-249.
  19. Gabriel S, Ziaugra L and Tabbaa D. SNP genotyping using the Sequenom MassARRAY iPLEX platform. *Current protocols in human genetics / editorial board, Jonathan L Haines [et al]*. 2009; Chapter 2:Unit 2.12.
  20. Thomas RK, Baker AC, Debiassi RM, Winckler W, Laframboise T, Lin WM, Wang M, Feng W, Zander T, MacConaill L, Lee JC, Nicoletti R, Hatton C, et al. High-throughput oncogene mutation profiling in human cancer. *Nature genetics*. 2007; 39:347-351.
  21. Adamec C. Example of the use of the nonparametric test.test X2 for comparison of 2 independent examples. [Article in Czech]. *Ceskoslovenske zdravotnictvi*. 1964; 12:613-619.
  22. Bland JM and Altman DG. Statistics notes. The odds ratio. *BMJ (Clinical research ed)*. 2000; 320:1468.
  23. Barrett JC, Fry B, Maller J and Daly MJ. Haploview: analysis and visualization of LD and haplotype maps. *Bioinformatics (Oxford, England)*. 2005; 21:263-265.
  24. Hawley ME and Kidd KK. HAPLO: a program using the EM algorithm to estimate the frequencies of multi-site haplotypes. *The Journal of heredity*. 1995; 86:409-411.
